# Supplementary material for: Comparative urine metabolomics of mice treated with non-toxic and toxic oral doses of (−)-epigallocatechin-3-gallate
Source: Royal Society of Chemistry journal article supplement (doi:10.1039/d3fo02710d), 2023-01-01
Supplement: d3fo02710d3.pdf [file d3fo02710d3.pdf]

## Supplemental Figures

**Figure S1.** Possible fragmentation pattern of mono-glucuronidated EGCG with glucuronide at epigallocatechin rather than the galloyl moiety in EGCG. For illustrative purpose, glucuronide is placed at the 7-position, which has previously been reported as a possible glucuronidation site.

**Figure S2.** Possible fragmentation pattern of mono-glucuronidated EGCG with glucuronide at the galloyl moiety. For illustrative purpose, glucuronide is placed at the 3"-position, which has previously been reported as a possible glucuronidation site.
