# Supplementary figures and images for: Comparative urine metabolomics of mice treated with non-toxic and toxic oral doses of (−)-epigallocatechin-3-gallate
Source: Royal Society of Chemistry journal article supplement (doi:10.1039/d3fo02710d), 2023-01-01

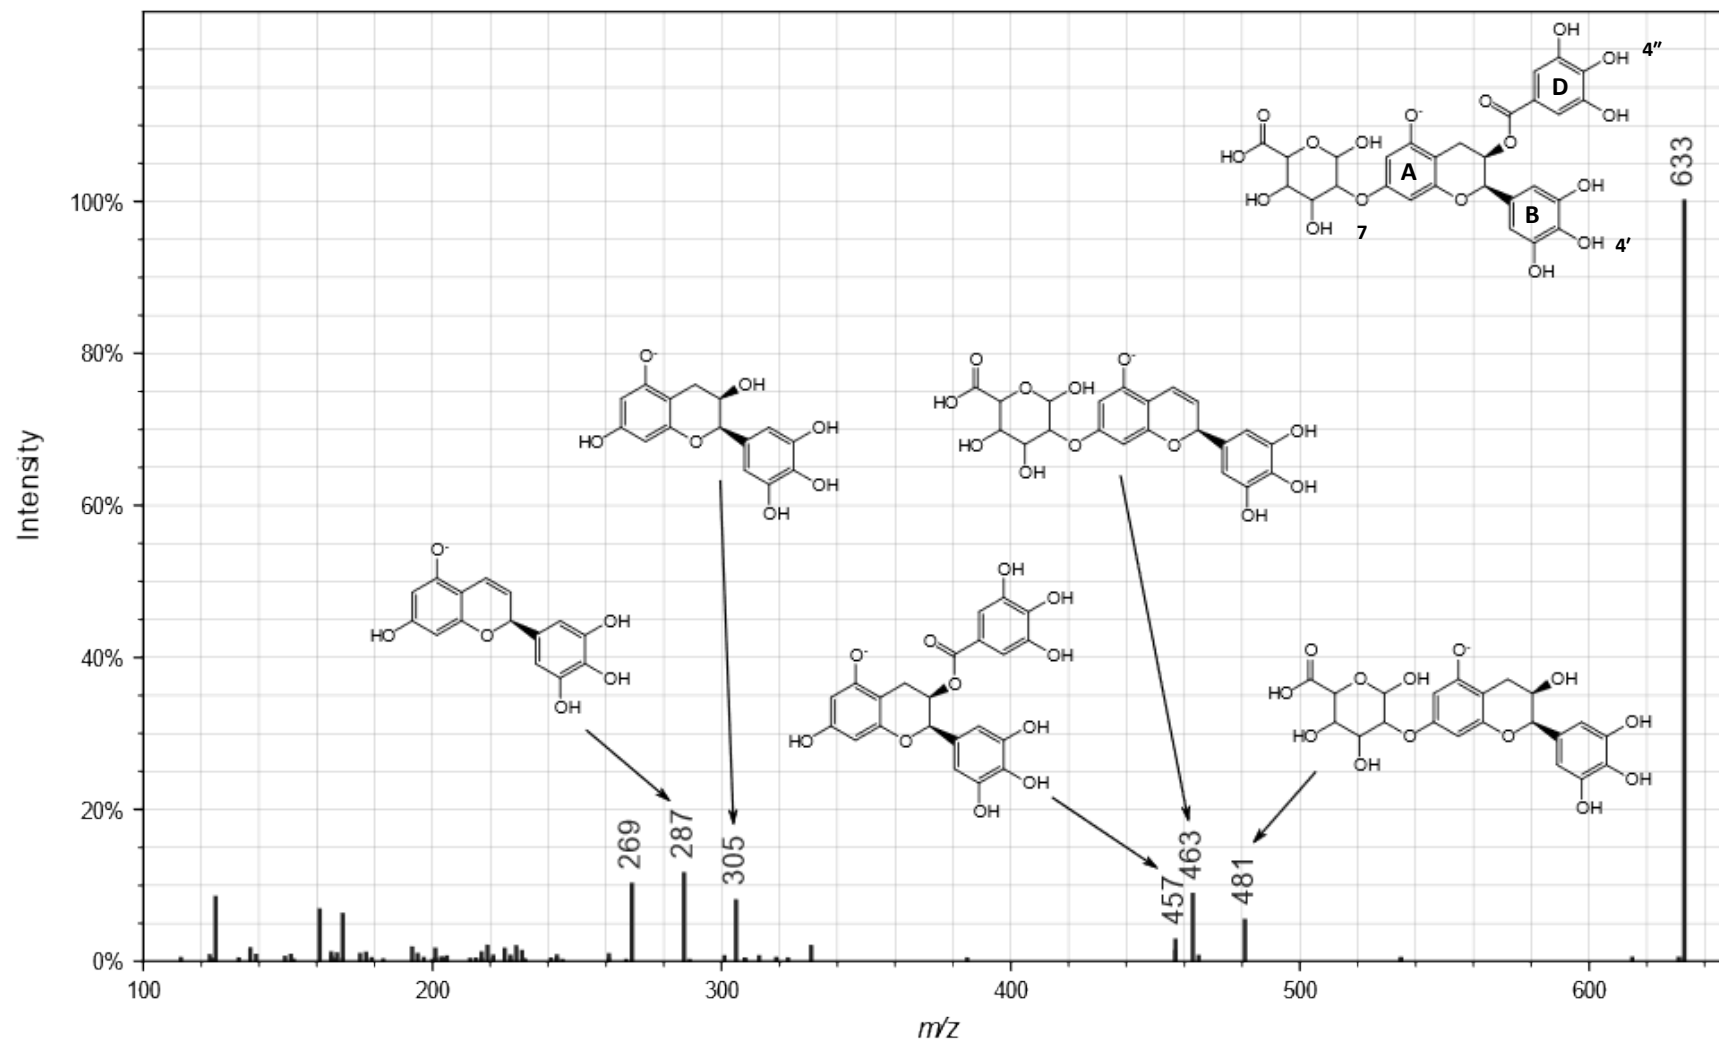

Supplement: d3fo02710d1.pdf [file d3fo02710d1.pdf]

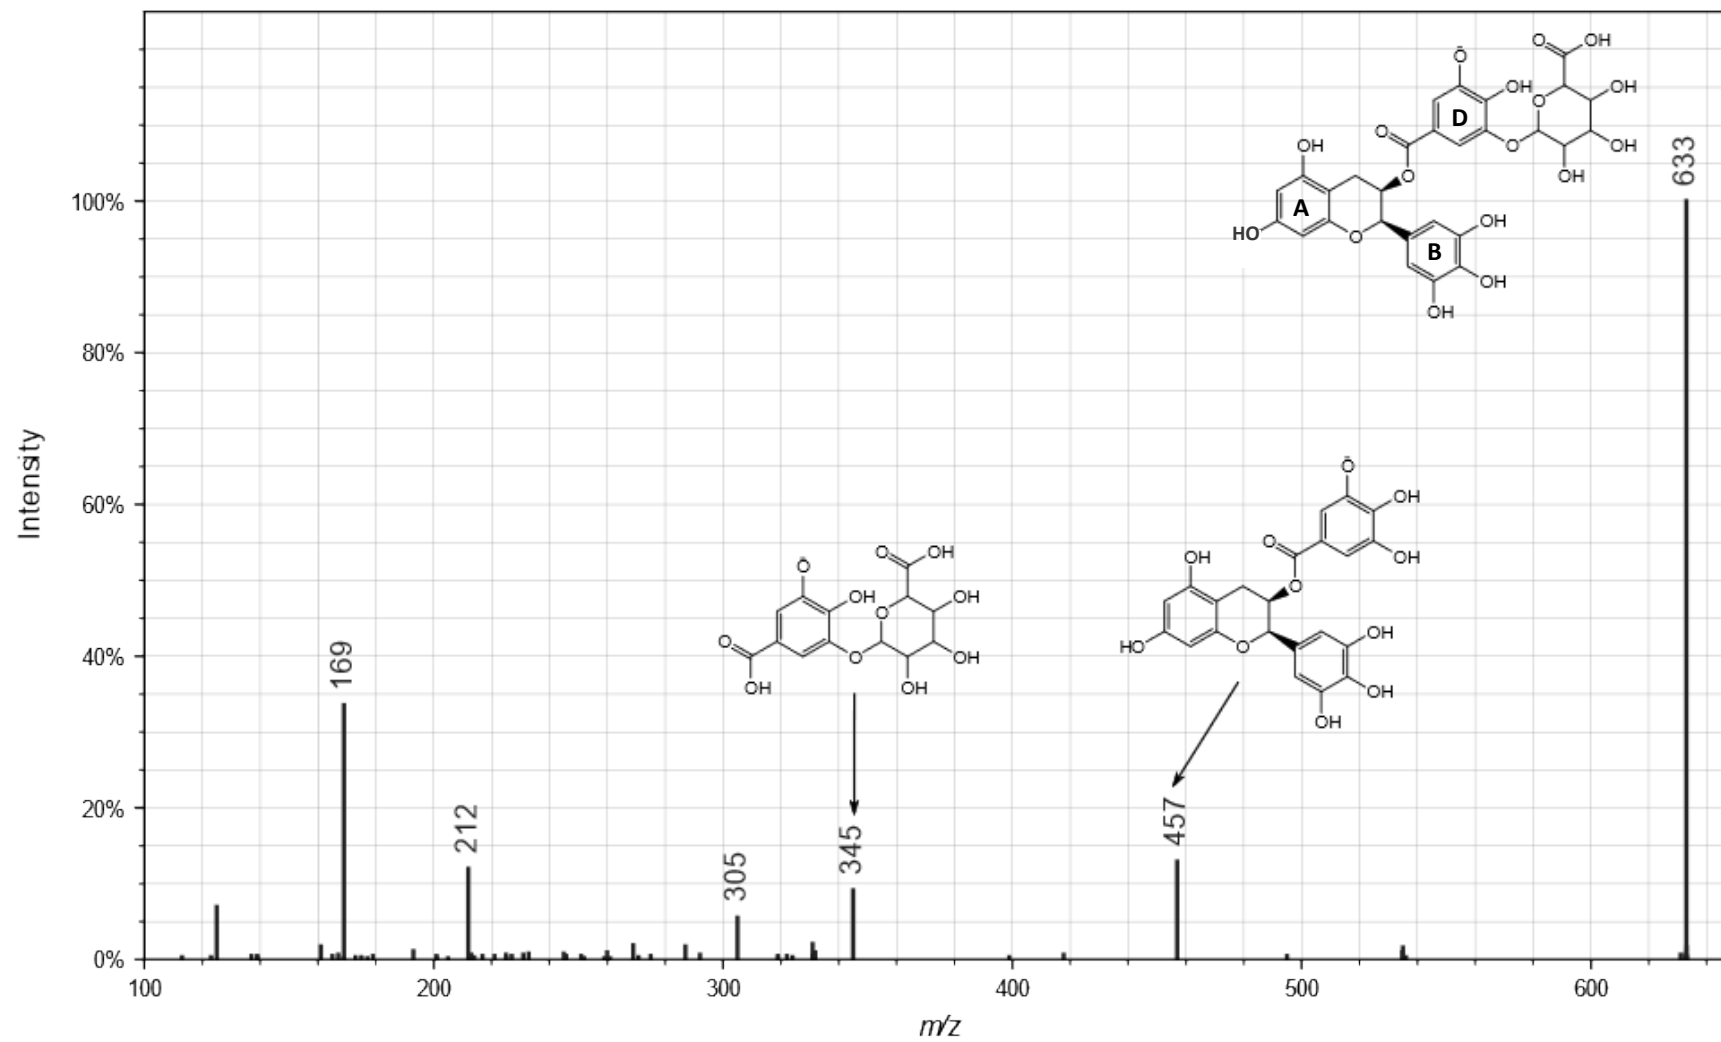

Supplement: d3fo02710d2.pdf [file d3fo02710d2.pdf]
